# Supplementary material for: Healthspan Enhancement by Olive Polyphenols in C. elegans Wild Type and Parkinson’s Models
Source: PubMed Central journal article supplement (PMC7312680; doi:10.3390/ijms21113893), 2020-05-29

**Table S1: Heat-stress survival characteristics during HD and HT treatment**

| treatment       | n   | mean survival (days) | SEM  | days until deaths of population reached |        |        |        |       |
|-----------------|-----|----------------------|------|-----------------------------------------|--------|--------|--------|-------|
|                 |     |                      |      | 25 %                                    | 50 %   | 75 %   | 90 %   | 100 % |
| control (water) | 114 | 2.96                 | 0.07 | 1.95                                    | 2.44   | 2.91   | 3.58   | 5     |
| 100 µg/ml HD    | 66  | 3.35*                | 0.12 | 2.15**                                  | 2.83** | 3.5    | 3.9    | 8     |
| 250 µg/ml HD    | 62  | 4.13**               | 0.21 | 2.38**                                  | 3.33** | 4.69** | 5.85** | 9     |
| 500 µg/ml HD    | 68  | 3.99**               | 0.17 | 2.38**                                  | 3.39** | 4.55** | 5.52** | 7     |
| <hr/>           |     |                      |      |                                         |        |        |        |       |
| control (water) | 90  | 2.23                 | 0.04 | 1.33                                    | 1.65   | 1.98   | 2.57   | 3     |
| 100 µg/ml HT    | 52  | 2.48*                | 0.08 | 1.45*                                   | 1.9*   | 2.48   | 2.85   | 4     |
| 250 µg/ml HT    | 65  | 2.71**               | 0.07 | 1.71**                                  | 2.25** | 2.68*  | 2.93*  | 4     |
| 500 µg/ml HT    | 79  | 2.54**               | 0.07 | 1.49**                                  | 1.99** | 2.55*  | 2.89*  | 4     |

Differences compared to control were considered significant at  $p < 0.05$  (\*) and  $p < 0.001$  (\*\*). p-value determination was realized with Log-Rank Test for the mean lifespan and Fisher's Exact Test for specific time points.

**Figure S1.** GC-MS analysis and phenolic compound identification, by spectrum matching and library searching in the NIST/EPS/NIH Mass Spectral Library Database, of HD. Peaks: 1, tyrosol; 2, Vanilic acid; 3, Hydroxytyrosol; 4, 3,4-dihydroxybenzoic acid; 5, citric acid (hydrolysis acid to obtain HD from OVW, olive aqueous vegetation water); 6, syringic acid; 7, gallic acid; 8, caffeic acid (trace); 9, 3-hydroxy,4-methoxyphenylacetic acid; 10, gentisic acid (trace).

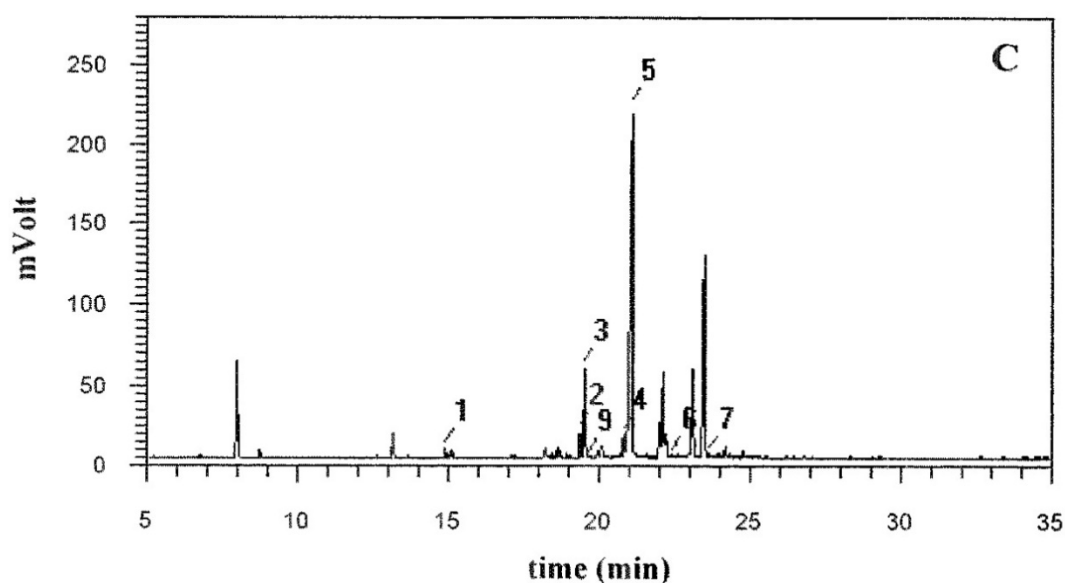

Supplement: ijms-21-03893-s001.pdf [file ijms-21-03893-s001.pdf]
